# Supplementary material for: CdSe/ZIF-8-x: synthesis and photocatalytic CO2 reduction performance
Source: Royal Society of Chemistry journal article supplement (doi:10.1039/c9ra08801f), 2020-01-01
Supplement: c9ra08801f1.pdf [file c9ra08801f1.pdf]

## **Supporting information**

### **CdSe/ZIF-8 Nanocomposites: Synthesis and Photocatalytic CO<sub>2</sub> Reduction Performance**

Hui-Juan Peng, Pei-Qin Zheng, Hsiu-Yi Chao, Long Jiang, Zheng-Ping Qiao\*

MOE Key Laboratory of Bioinorganic and Synthetic Chemistry, School of  
Chemistry, Sun Yat-Sen University, Guangzhou, 510275, China

\* E-mail: cesqzp@mail.sysu.edu.cn

## Materials

Reagents in this work was used without further purification, including 1-octadecene (ODE, 90%, ACROS), n-hexane (97%, Aladdin) , selenium powder (99.9%, Aladdin), oleylamine (90%, Innochem), trioctylphosphine (TOP, 90%, Aladdin), cadmium oxide (99%, Aladdin), 2-methylimidazole (Hmim, 98%, Macklin), zinc nitrate hexahydrate (99%, Guangzhou chemical reagent factory), n-hexanol (99%, Aladdin), Ethanol absolute (99.7%, Tianjin baishi chemical industry)  $[\text{Ru}(\text{bpy})_3]\text{Cl}_2 \cdot 6\text{H}_2\text{O}$  (bpy=2',2'-bipyridine) (98%, Aladdin), triethanolamine (99%, Aladdin), acetonitrile (99.9%, Macklin).

## Synthesis of CdSe QDs

CdSe QDs were synthesized via modification of previously reported procedure.<sup>[1]</sup> 0.0258 g CdO (0.2 mmol)、 0.1669 g (0.6 mmol) stearic acid (SA) and 3 ml ODE were loaded into a 250 mL three-neck flask , and was heated to 120 °C with stirring under N<sub>2</sub> flow. After being degassed under vacuum for 15 min, the mixture was heated up to 275 °C to form a colorless clear solution. At this temperature, the Se solution containing 0.1316 g (1.7 mmol) of Se dissolved in 1.2 mL OAm and 0.8 ml ODE was swiftly injected into the reaction flask., and the reaction was immediately terminated by removing the heat resource. The resulting CdSe QDs were precipitated by adding ethanol and dispersed in 5ml hexane as a stock solution.

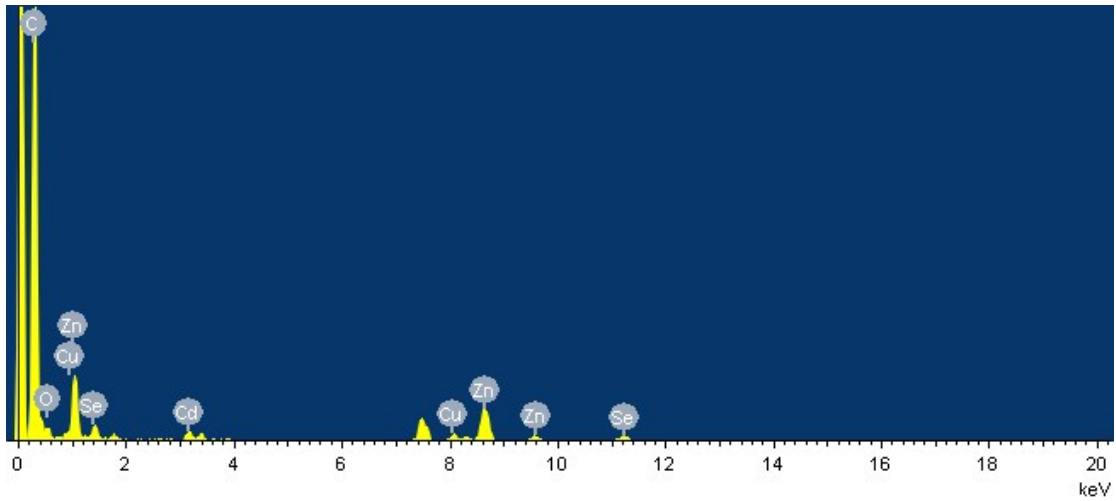

Fig. S1 EDS spectrum of sample 3.

Table. S1 Element analysis of sample 3.

| Element        | Weight% | Atomic% |
|----------------|---------|---------|
| C              | 55.10   | 86.89   |
| O              | 0.39    | 0.46    |
| Ni             | 11.32   | 3.65    |
| Zn             | 26.82   | 7.77    |
| Se             | 2.16    | 0.52    |
| Cd             | 4.21    | 0.71    |
| Total quantity | 100     |         |

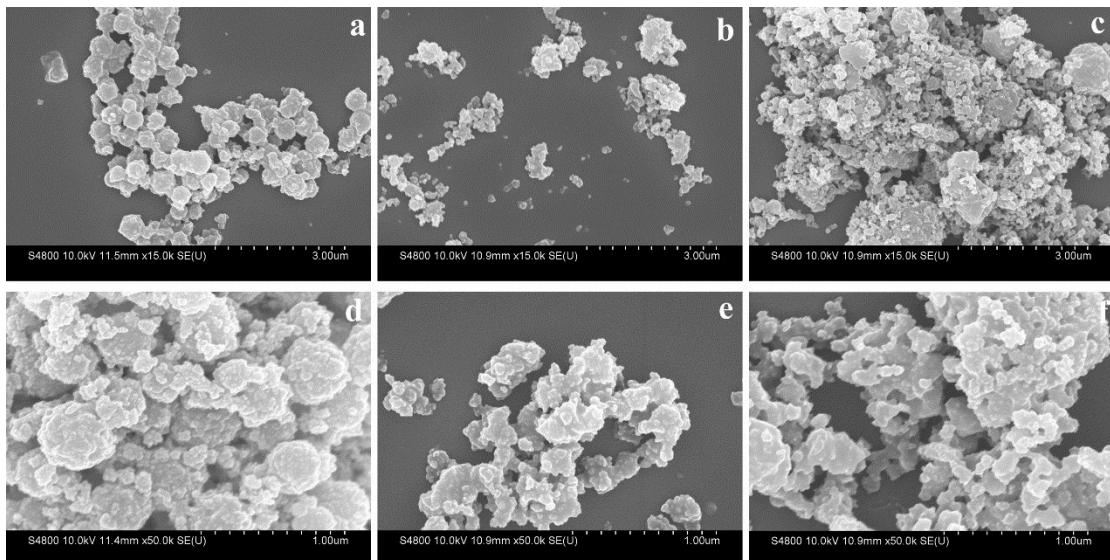

Fig. S2 SEM images of sample 1(a, c), 2(b, e) and 3(c,f) (a-c magnification 15k, d-f magnification 50k)

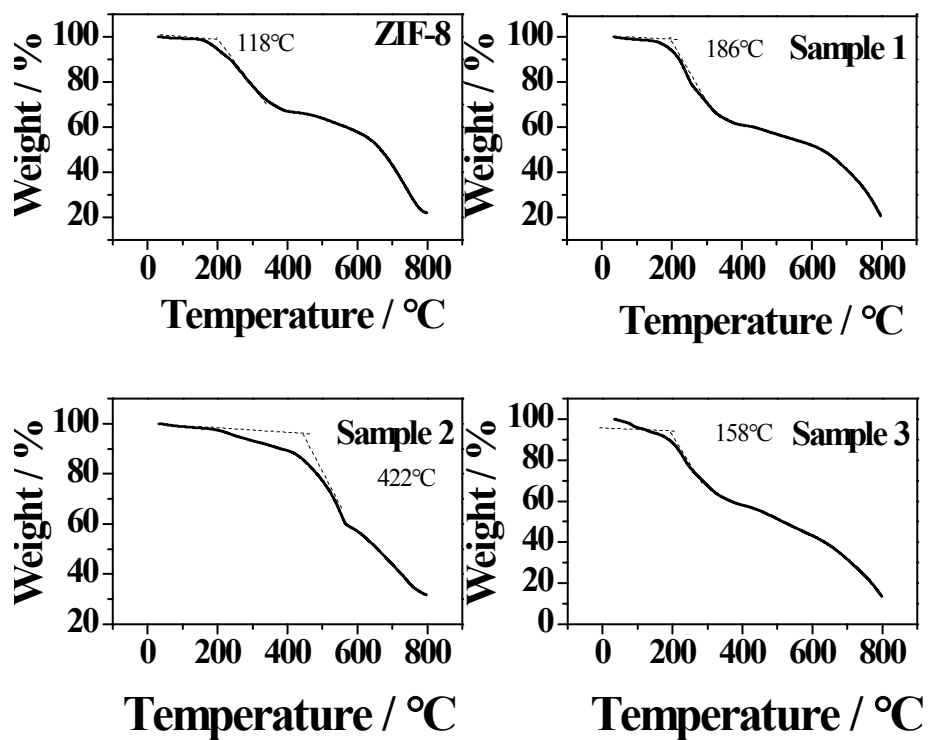

Fig.S3 TGA of ZIF-8 and samples.

Table S2 Summary of CO<sub>2</sub> photocatalytic activities of the samples (with N<sub>2</sub> as gas feedstock).

| Sample   | CO<br>production rate<br>( $\mu\text{mol g}^{-1} \text{h}^{-1}$ ) | CH <sub>4</sub><br>production rate<br>( $\mu\text{mol g}^{-1} \text{h}^{-1}$ ) |
|----------|-------------------------------------------------------------------|--------------------------------------------------------------------------------|
| Sample 1 | 0.024                                                             | 0.104                                                                          |
| Sample 2 | 0.009                                                             | 0.000                                                                          |
| Sample 3 | 0.031                                                             | 0.094                                                                          |

## Reference

1. B. Mahler, P. Spinicelli, S. Buil, X. Quelin, J. P. Hermier and B. Dubertret, *Nature materials*, 2008, **7**, 659-664.
